# Supplementary material for: Functional characterization of endogenous siRNA target genes in Caenorhabditis elegans
Source: PubMed Central journal article supplement (PMC2440555; doi:10.1186/1471-2164-9-270), 2008-06-03
Supplement: 1471-2164-9-270-S4.pdf [file 1471-2164-9-270-S4.pdf]

Supplementary table 5.

|                                          |                                                       |          |                 |                |
|------------------------------------------|-------------------------------------------------------|----------|-----------------|----------------|
| <b>All siRNAs with putative target</b>   | <b>Biological process</b>                             | <b>n</b> | <b>Per cent</b> | <b>p-value</b> |
|                                          | embryonic development                                 | 534      | 23.9            | 3.6E-44        |
|                                          | multicellular organismal process                      | 729      | 32.7            | 7.3E-42        |
|                                          | reproduction                                          | 397      | 17.8            | 2.0E-32        |
|                                          | larval development                                    | 321      | 14.4            | 4.3E-24        |
|                                          | growth                                                | 388      | 17.4            | 6.1E-24        |
|                                          | post-embryonic development                            | 339      | 15.2            | 7.1E-24        |
|                                          | cell division                                         | 100      | 4.5             | 7.9E-23        |
|                                          | embryonic cleavage                                    | 68       | 3.0             | 9.4E-16        |
|                                          | sexual reproduction                                   | 170      | 7.6             | 2.1E-15        |
|                                          | reproductive process                                  | 185      | 8.3             | 1.2E-14        |
|                                          | <b>Molecular function</b>                             | <b>n</b> | <b>Per cent</b> | <b>p-value</b> |
|                                          | nucleotide binding                                    | 291      | 13.0            | 1.7E-23        |
|                                          | purine nucleotide binding                             | 245      | 11.0            | 4.5E-16        |
|                                          | ribonucleotide binding                                | 235      | 10.5            | 4.6E-16        |
|                                          | ATP binding                                           | 205      | 9.2             | 6.1E-15        |
|                                          | adenyl ribonucleotide binding                         | 205      | 9.2             | 7.6E-15        |
|                                          | protein binding                                       | 398      | 17.8            | 9.7E-15        |
|                                          | RNA binding                                           | 83       | 3.7             | 8.6E-12        |
|                                          | nucleic acid binding                                  | 295      | 13.2            | 6.5E-11        |
| helicase activity                        | 28                                                    | 1.3      | 1.0E-5          |                |
| protein serine/threonine kinase activity | 83                                                    | 3.7      | 1.9E-5          |                |
| <b>18 nucleotides long siRNAs</b>        | <b>Biological process</b>                             | <b>n</b> | <b>Per cent</b> | <b>p-value</b> |
|                                          | cellular component organization and biogenesis        | 17       | 16.2            | 7.9E-6         |
|                                          | embryonic development ending in birth or egg hatching | 28       | 26.7            | 5.6E-5         |
|                                          | developmental process                                 | 36       | 34.3            | 6.0E-5         |
|                                          | multicellular organismal development                  | 35       | 33.3            | 7.5E-5         |
|                                          | embryonic development                                 | 28       | 26.7            | 8.5E-5         |
|                                          | <b>Molecular function</b>                             | <b>n</b> | <b>Per cent</b> | <b>p-value</b> |
|                                          | purine ribonucleotide binding                         | 15       | 14.3            | 4.2E-3         |
|                                          | ribonucleotide binding                                | 15       | 14.3            | 4.2E-3         |
|                                          | purine nucleotide binding                             | 15       | 14.3            | 6.8E-3         |
|                                          | microtubule motor activity                            | 3        | 2.9             | 1.1E-2         |
| nucleotide binding                       | 15                                                    | 14.3     | 1.8E-2          |                |
| <b>19 nucleotides long siRNAs</b>        | <b>Biological process</b>                             | <b>n</b> | <b>Per cent</b> | <b>p-value</b> |
|                                          | cell cycle                                            | 17       | 8.1             | 2.0E-7         |
|                                          | cell division                                         | 16       | 7.7             | 9.0E-7         |
|                                          | embryonic development                                 | 54       | 25.8            | 1.3E-6         |
|                                          | organelle organization and biogenesis                 | 18       | 8.6             | 8.7E-6         |
|                                          | microtubule-based process                             | 10       | 4.8             | 6.4E-5         |
|                                          | <b>Molecular function</b>                             | <b>n</b> | <b>Per cent</b> | <b>p-value</b> |
|                                          | nucleic acid binding                                  | 31       | 14.8            | 6.0E-3         |
|                                          | actin binding                                         | 4        | 1.9             | 1.6E-2         |
|                                          | enzyme binding                                        | 3        | 1.4             | 2.7E-2         |
|                                          | nucleotide binding                                    | 24       | 11.5            | 2.9E-2         |
| cytoskeletal protein binding             | 4                                                     | 1.9      | 3.6E-2          |                |

|                                       |                                                       |          |                 |                |
|---------------------------------------|-------------------------------------------------------|----------|-----------------|----------------|
| <b>20 nucleotides<br/>long siRNAs</b> | <b>Biological process</b>                             | <b>n</b> | <b>Per cent</b> | <b>p-value</b> |
|                                       | developmental process                                 | 130      | 37.6            | 6.4E-12        |
|                                       | embryonic development ending in birth or egg hatching | 94       | 27.2            | 5.9E-10        |
|                                       | reproduction                                          | 76       | 22.0            | 2.3E-9         |
|                                       | multicellular organismal process                      | 127      | 36.7            | 2.7E-9         |
|                                       | cell division                                         | 25       | 7.2             | 6.7E-9         |
|                                       | <b>Molecular function</b>                             | <b>n</b> | <b>Per cent</b> | <b>p-value</b> |
|                                       | nucleic acid binding                                  | 61       | 17.6            | 3.8E-6         |
|                                       | nucleotide binding                                    | 50       | 14.5            | 3.0E-5         |
|                                       | RNA binding                                           | 16       | 4.6             | 1.5E-3         |
|                                       | protein binding                                       | 66       | 19.1            | 1.6E-3         |
| adenyl nucleotide binding             | 36                                                    | 10.4     | 1.8E-3          |                |
| <b>21 nucleotides<br/>long siRNAs</b> | <b>Biological process</b>                             | <b>n</b> | <b>Per cent</b> | <b>p-value</b> |
|                                       | embryonic development ending in birth or egg hatching | 193      | 30.2            | 4.2E-27        |
|                                       | multicellular organismal development                  | 230      | 35.9            | 3.5E-20        |
|                                       | reproduction                                          | 139      | 21.7            | 2.8E-16        |
|                                       | post-embryonic development                            | 121      | 18.9            | 2.6E-13        |
|                                       | larval development                                    | 114      | 17.8            | 6.3E-13        |
|                                       | <b>Molecular function</b>                             | <b>n</b> | <b>Per cent</b> | <b>p-value</b> |
|                                       | nucleic acid binding                                  | 107      | 16.7            | 1.2E-9         |
|                                       | RNA binding                                           | 31       | 4.8             | 6.7E-7         |
|                                       | protein binding                                       | 121      | 18.9            | 3.0E-6         |
|                                       | nucleotide binding                                    | 80       | 12.5            | 7.4E-6         |
| purine ribonucleotide binding         | 65                                                    | 10.2     | 2.1E-4          |                |
| <b>22 nucleotides<br/>long siRNAs</b> | <b>Biological process</b>                             | <b>n</b> | <b>Per cent</b> | <b>p-value</b> |
|                                       | multicellular organismal development                  | 293      | 33.4            | 1.1E-21        |
|                                       | embryonic development ending in birth or egg hatching | 221      | 25.2            | 2.7E-20        |
|                                       | reproduction                                          | 170      | 19.4            | 7.5E-16        |
|                                       | growth                                                | 161      | 18.4            | 1.1E-10        |
|                                       | cell division                                         | 44       | 5.0             | 1.4E-10        |
|                                       | <b>Molecular function</b>                             | <b>n</b> | <b>Per cent</b> | <b>p-value</b> |
|                                       | nucleotide binding                                    | 120      | 13.7            | 6.8E-10        |
|                                       | nucleic acid binding                                  | 138      | 15.8            | 3.6E-9         |
|                                       | protein binding                                       | 174      | 19.9            | 4.0E-9         |
|                                       | purine ribonucleotide binding                         | 98       | 11.2            | 2.1E-7         |
| ATP binding                           | 86                                                    | 9.8      | 4.7E-7          |                |
| <b>23 nucleotides<br/>long siRNAs</b> | <b>Biological process</b>                             | <b>n</b> | <b>Per cent</b> | <b>p-value</b> |
|                                       | multicellular organismal development                  | 87       | 25.4            | 1.6E-5         |
|                                       | reproduction                                          | 50       | 14.6            | 1.9E-4         |
|                                       | anatomical structure development                      | 34       | 9.9             | 4.9E-4         |
|                                       | cell division                                         | 14       | 4.1             | 7.5E-4         |
|                                       | cell cycle process                                    | 13       | 3.8             | 1.2E-3         |
|                                       | <b>Molecular function</b>                             | <b>n</b> | <b>Per cent</b> | <b>p-value</b> |
|                                       | protein binding                                       | 52       | 15.2            | 3.5E-3         |
|                                       | nucleotide binding                                    | 33       | 9.7             | 1.1E-2         |
|                                       | purine ribonucleotide binding                         | 28       | 8.2             | 2.0E-2         |
|                                       | metal ion binding                                     | 40       | 11.7            | 3.2E-2         |
| cofactor binding                      | 8                                                     | 2.3      | 4.4E-2          |                |

|                                                                 |                                                                 |          |                 |                |
|-----------------------------------------------------------------|-----------------------------------------------------------------|----------|-----------------|----------------|
| <b>24 nucleotides<br/>long siRNAs</b>                           | <b>Biological process</b>                                       | <b>n</b> | <b>Per cent</b> | <b>p-value</b> |
|                                                                 | phosphorus metabolism                                           | 11       | 10.7            | 5.9E-04        |
|                                                                 | phosphate metabolism                                            | 11       | 10.7            | 5.9E-04        |
|                                                                 | biopolymer modification                                         | 13       | 12.6            | 7.6E-04        |
|                                                                 | protein modification                                            | 12       | 11.7            | 2.1E-03        |
|                                                                 | protein amino acid phosphorylation                              | 8        | 7.8             | 3.6E-03        |
|                                                                 | <b>Molecular function</b>                                       | <b>n</b> | <b>Per cent</b> | <b>p-value</b> |
|                                                                 | protein serine/threonine kinase activity                        | 7        | 6.8             | 8.1E-04        |
|                                                                 | protein kinase activity                                         | 9        | 8.7             | 3.3E-03        |
|                                                                 | phosphotransferase activity, alcohol group as acceptor          | 9        | 8.7             | 6.1E-03        |
| kinase activity                                                 | 9                                                               | 8.7      | 8.5E-03         |                |
| transferase activity, transferring phosphorus-containing groups | 9                                                               | 8.7      | 2.3E-02         |                |
| <b>25 nucleotides<br/>long siRNAs</b>                           | <b>Biological process</b>                                       | <b>n</b> | <b>Per cent</b> | <b>p-value</b> |
|                                                                 | biopolymer modification                                         | 7        | 6.6             | 8.7E-02        |
|                                                                 | protein modification                                            | 7        | 6.6             | 7.7E-02        |
|                                                                 | macromolecule metabolism                                        | 12       | 11.3            | 7.2E-02        |
|                                                                 | protein metabolism                                              | 10       | 9.4             | 7.2E-02        |
|                                                                 | biopolymer metabolism                                           | 10       | 9.4             | 3.0E-02        |
|                                                                 | <b>Molecular function</b>                                       | <b>n</b> | <b>Per cent</b> | <b>p-value</b> |
|                                                                 | protein serine/threonine kinase activity                        | 11       | 8.0             | 1.3E-4         |
|                                                                 | ATP binding                                                     | 16       | 11.7            | 3.4E-4         |
|                                                                 | adenyl ribonucleotide binding                                   | 16       | 11.7            | 3.5E-4         |
| adenyl nucleotide binding                                       | 16                                                              | 11.7     | 6.7E-4          |                |
| protein kinase activity                                         | 11                                                              | 8.0      | 8.0E-4          |                |
| <b>26 nucleotides<br/>long siRNAs</b>                           | <b>Biological process</b>                                       | <b>n</b> | <b>Per cent</b> | <b>p-value</b> |
|                                                                 | phosphate metabolic process                                     | 26       | 11.9            | 4.4E-09        |
|                                                                 | biopolymer modification                                         | 27       | 12.3            | 1.7E-07        |
|                                                                 | cellular protein metabolic process                              | 32       | 14.6            | 1.1E-04        |
|                                                                 | cellular macromolecule metabolic process                        | 32       | 14.6            | 2.0E-04        |
|                                                                 | biopolymer metabolic process                                    | 38       | 17.4            | 2.4E-04        |
|                                                                 | <b>Molecular function</b>                                       | <b>n</b> | <b>Per cent</b> | <b>p-value</b> |
|                                                                 | protein serine/threonine kinase activity                        | 19       | 8.7             | 8.5E-08        |
|                                                                 | transferase activity, transferring phosphorus-containing groups | 22       | 10.0            | 9.2E-06        |
|                                                                 | phosphotransferase activity, alcohol group as acceptor          | 19       | 8.7             | 9.8E-06        |
| adenyl nucleotide binding                                       | 26                                                              | 11.9     | 1.3E-05         |                |
| ATP binding                                                     | 24                                                              | 11.0     | 4.2E-05         |                |

In order to best describe all large functional groups among the putative siRNA targets in the whole collection, the excessive redundancy of GO terms was parsed when observed. For example the similar count for "developmental process", "multicellular organismal development", and "embryonic development" which occurs at different levels of GO hierarchy with nearly identical enrichment (p values 2.8E-49, 9.0E-48, and 3.6E-44, respectively) was presented by the most accurately describing term, i.e. "embryonic development, p value 3.6E-44"
