# Supplementary material for: Functional characterization of endogenous siRNA target genes in Caenorhabditis elegans
Source: PubMed Central journal article supplement (PMC2440555; doi:10.1186/1471-2164-9-270), 2008-06-03
Supplement: 1471-2164-9-270-S6.pdf [file 1471-2164-9-270-S6.pdf]

**Supplementary Figure 1:** The frequency sequence graphs (logos) of the combined library of short RNAs, also including those without putative targets, from Lee et al. (2006) and Ruby et al. (2006). The number of siRNAs in each length category is shown on the right.

| siRNA length | Sequence logo                                                                       | Number of siRNAs |
|--------------|-------------------------------------------------------------------------------------|------------------|
| 12           |    | 25               |
| 13           |    | 22               |
| 14           |    | 16               |
| 15           |    | 15               |
| 16           |    | 20               |
| 17           |  | 118              |
| 18           |  | 286              |
| 19           |  | 464              |
| 20           |  | 757              |
| 21           |  | 1209             |
| 22           |  | 2013             |
| 23           |  | 798              |
| 24           |  | 375              |
| 25           |  | 304              |
